# Supplementary material for: Different Cis-Regulatory Elements Control the Tissue-Specific Contribution of Plastid ω-3 Desaturases to Wounding and Hormone Responses
Source: Frontiers journal article supplement (doi:10.3389/fpls.2021.727292), 2021-10-27
Supplement: Data_Sheet_1.PDF [file Data_Sheet_1.PDF]

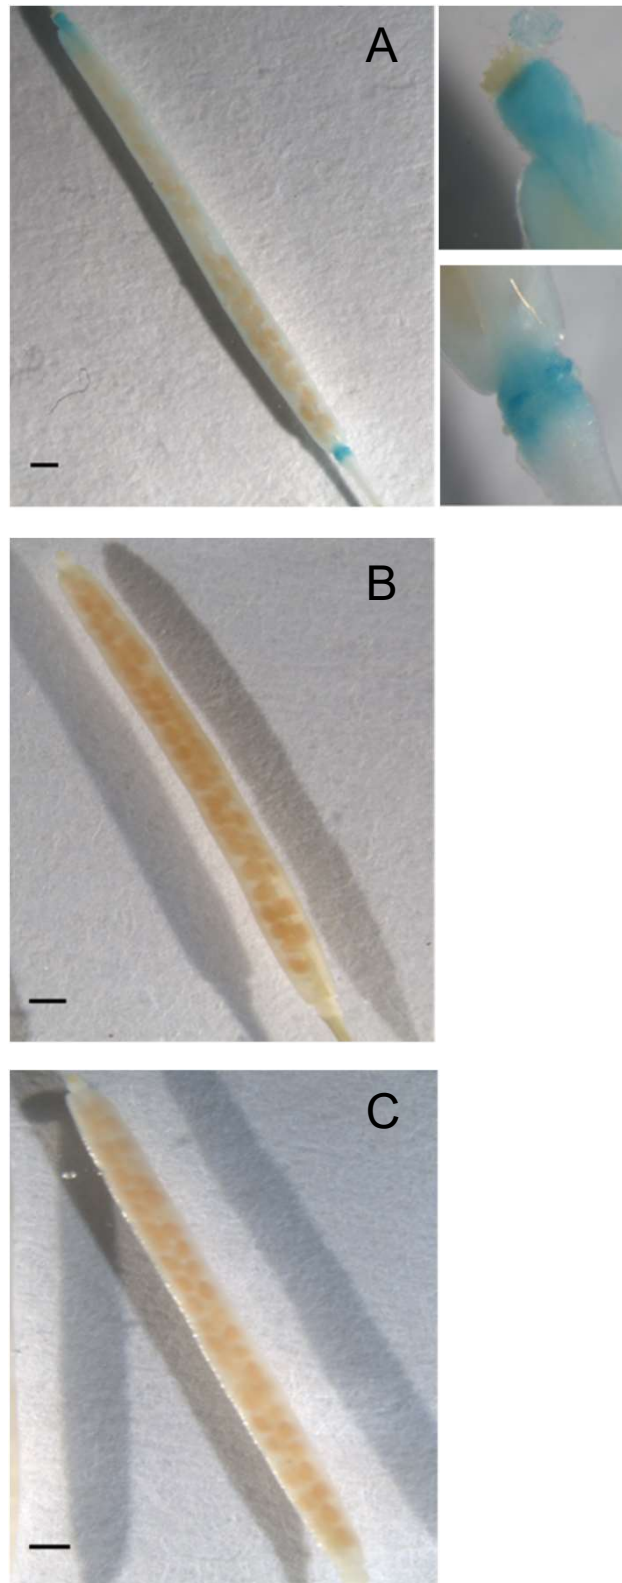

**Supplementary Figure 1.** GUS histochemical activity in seeds from *Arabidopsis* transgenic lines expressing the 1682 bp *AtFAD7* promoter::*GUS* fusión (A), the 2958 bp *AtFAD8* promoter::*GUS* fusión (B) and the empty vector (C). A detail photograph of the extremes of the pod in A is also shown. Bars represent 500 µm size.
